# Supplementary material for: Influence of Ceria Addition on Crystallization Behavior and Properties of Mesoporous Bioactive Glasses in the SiO2–CaO–P2O5–CeO2 System
Source: MDPI journal article supplement (doi:10.3390/gels8060344), 2022-05-31
Supplement: s1 [file s1]

## Supplementary Information

### Influence of ceria addition on crystallization behavior and properties of several bioactive glasses in the $\text{SiO}_2\text{-CaO-P}_2\text{O}_5\text{-CeO}_2$ system

Elena Maria Anghel, Simona Petrescu \*, Oana Catalina Mocioiu, Jeanina Pandeale Cusu and Irina Atkinson\*

Institute of Physical Chemistry ‘Ilie Murgulescu’ of Romanian Academy, Spl. Independentei 202, Spl. Independentei 202, 060021, Bucharest, Romania

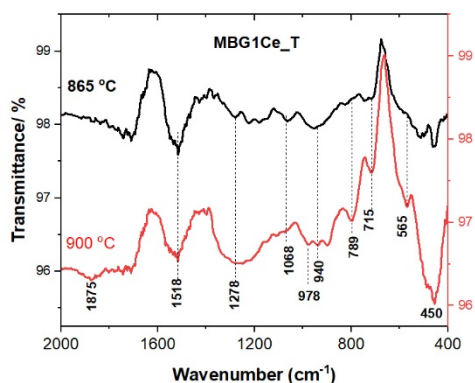

**Figure S1.** FT-IR spectra of the MBG1Ce annealed at 865 and 900 °C

**Table S1**UV-Raman band positions of the annealed MBG5Ce\_T spectra and assignments within 330-1200  $\text{cm}^{-1}$  spectral range

| $\text{CeO}_2$ | MBG5Ce_T |          |     |     | Assignment                                           | Reference |
|----------------|----------|----------|-----|-----|------------------------------------------------------|-----------|
|                | RT       | 830      | 876 | 906 |                                                      |           |
| 456            |          | 392      | 390 | 404 | Si-O-Si bending                                      |           |
|                |          | 437      |     |     | $[\delta(\text{O-P-O}^-)]$ in $\text{Q}^0(\text{P})$ |           |
|                | 459      |          | 446 |     | $\text{F}_{2g}$ modes of $\text{CeO}_2$              | 43        |
|                |          |          |     | 464 | quartz                                               | 44        |
|                | 531      | 499      | 549 | 512 |                                                      |           |
|                | 575      | 562      |     | 572 | Si-O-Si vibrations in $\text{Q}^2(\text{Si})$        |           |
|                | 620      | 595, 624 | 590 |     | $\text{CePO}_4$ and Si-O-Si                          | 45        |

|        |        |        |        |                                                                                  |            |
|--------|--------|--------|--------|----------------------------------------------------------------------------------|------------|
|        |        |        |        | vibrations in Q <sup>2</sup> (Si)                                                |            |
|        |        | 642    | 634    | Si-O-Si bending in                                                               | 46         |
|        |        |        |        | Wollastonite                                                                     |            |
| 833    |        | 827    | 785    | P-O-P symmetric stretch                                                          | 46         |
| 848    | 848    | 857    | 840    | Si-O stretch of Q <sup>0</sup> (Si)                                              | 24         |
| 947    | 937    |        | 944    | P-O stretch of Q <sup>0</sup> (P)                                                | 24 and 43  |
| 974    | 990    | 950    | 967    | Si-O stretch in Q <sup>2</sup> (Si)                                              | 24         |
|        | 1097   |        |        | $\nu_1(\text{CO}_3^{2-})$                                                        | 47         |
| 1152   |        |        | 1153   | Si-O-P bonds (1140 cm <sup>-1</sup> )                                            | 32         |
| 1167   |        | 1186   |        | 2LO modes of ceria, $\nu_3(\text{PO}_4)$ and Si-O stretch of Q <sup>4</sup> (Si) | 44, and 24 |
|        |        | 1237   | 1272   | 1249                                                                             |            |
| 0.9981 | 0.9990 | 0.9981 | 0.9989 | R <sup>2</sup>                                                                   |            |

**Table S2** Results (T<sub>x</sub> and T<sub>cl</sub>) of fitted DSC curves of the MBG(0/1/5Ce)

| $\beta$ /°C<br>min. <sup>-1</sup> | MBG0Ce                |                       |              |                                           | MBG1Ce                |                       |              |                                       | MBG5Ce                |                       |              |                                           |
|-----------------------------------|-----------------------|-----------------------|--------------|-------------------------------------------|-----------------------|-----------------------|--------------|---------------------------------------|-----------------------|-----------------------|--------------|-------------------------------------------|
|                                   | T <sub>x</sub><br>/°C | T <sub>p</sub><br>/°C | FWH<br>M /°C | T <sub>x</sub> -<br>T <sub>g</sub><br>/°C | T <sub>x</sub><br>/°C | T <sub>p</sub><br>/°C | FWH<br>M /°C | T <sub>x</sub> -T <sub>g</sub><br>/°C | T <sub>x</sub><br>/°C | T <sub>p</sub><br>/°C | FWH<br>M /°C | T <sub>x</sub> -<br>T <sub>g</sub><br>/°C |
| 5                                 | 859                   | 868                   | 21.98        | 345                                       | 854                   | 855                   | 18.75        | 214                                   | 761                   | 815                   | 48.66        | 123                                       |
| 10                                | 866                   | 878                   | 23.58        | 340                                       | 853                   | 865                   | 19.65        | 211                                   | 788                   | 830                   | 41.17        | 149                                       |
| 15                                | 867                   | 882                   | 24.72        | 344                                       | 860                   | 872                   | 21.40        | 208                                   | 794                   | 837                   | 41.08        | 145                                       |
| 20                                | 871                   | 888                   | 26.05        | 343                                       | 861                   | 875                   | 21.41        | 206                                   | 800                   | 842                   | 40.13        | 150                                       |
| 25                                | 876                   | 892                   | 27.35        | 348                                       | 860                   | 878                   | 23.11        | 201                                   | 811                   | 845                   | 38.71        | 159                                       |

T<sub>x</sub>=onset temperature of the first crystallization event

## References:

- [24] H. Aguiar, J. Serra, P. González, B. León, Structural study of sol–gel silicate glasses by IR and Raman spectroscopies, *J. Non-Cryst. Solid.* 355 (2009) 475–480. doi:10.1016/j.jnoncrysol.2009.01.01
- [30] M.H. Brooker, Raman and i.r. spectra of zinc, cadmium and calcium nitrate: a study of the low temperature phase transitions in calcium nitrate, *Spectrochim. Acta* 1975; 32A: 369-377. Doi:10.1016/0584-8539(76)80090-6
- [43] Padilla, S.; Roman, J.; Carenas, A.; Vallet-Regi, M. The influence of the phosphorus content on the bioactivity of sol–gel glass ceramics, *Biomaterials* 2005; 26: 475–483. doi:10.1016/j.biomaterials.2004.02.054
- [44] M. M. Pereira, A. E. Clark, L. L. Hench, Calcium phosphate formation on sol-gel-derived bioactive glasses in vitro, *J. Biomed. Mater. Res.* 1994; 28: 693-698. Doi: 10.1002/jbm.820280606
- [45] De Ligny, D.; Neuville, D.R. 12-Raman spectroscopy: a valuable tool to improve our understanding of nucleation and growth mechanism. in *From Glass to Crystal. Nucleation, growth and phase separation: from research to applications.* Neuville, D.R.; Cormier, L.; Caurant, D.; Montagne L. eds. EDP Sciences 2017, Les Ulis, France, pp 319-344.
- [46] Taniguchi, T.; Watanabe, T.; Sugiyama, N.; Subramani, A.K.; Wagata, H.; Matsushita, N.; Yoshimura, M. Identifying defects in ceria-based nanocrystals by UV resonance Raman spectroscopy. *J. Phys. Chem. C* 2009, 113, 19789–19793. Doi:10.1021/jp9049457
- [47] Olivares, M.; Zuluaga, M.C.; Ortega, L.A.; Murelaga, X.; Alonso-Olazabal, A.; Urteaga, M.; Amundaray, L.; Alonso-Martina, I.; Etxebarria, N. Characterisation of fine wall and eggshell Roman pottery by Raman spectroscopy. *J. Ram. Spectrosc.* 2010, 41, 1543–1549. doi: 10.1002/jrs.2748
